# Supplementary material for: Metal phosphonates as heterogeneous catalysts for highly efficient chemical fixation of CO2 under mild conditions
Source: Royal Society of Chemistry journal article supplement (doi:10.1039/d2ce01162j), 2022-01-01
Supplement: d2ce01162j1.pdf [file d2ce01162j1.pdf]

## Supporting Information

### **Metal phosphonates as heterogeneous catalysts for highly efficient chemical fixation of CO<sub>2</sub> under mild conditions**

Yi-xin Wang, Jing-hui Zhou, Jun Xiong, Wan-qi Huang, Quan Li, Xue Min\* and Ming Li \*

School of Chemistry and Chemical Engineering, Hubei Key Laboratory of Biomass Fibers and Eco-dyeing & Finishing, Wuhan Textile University, Wuhan 430200, China, E-mail: xmin@wtu.edu.cn

### **Supplementary Index**

Contents

S1. Methods

S2. Supplementary tables and figures

S3. The NMR spectrums

## S1. Methods

### 1.1 General information

Powder X-ray diffraction (PXRD) was carried out with a MiniFlex 600 X-ray powder diffractometer equipped with a Cu sealed tube ( $\lambda = 1.54178 \text{ \AA}$ ) at 40 kV and 40 mA. Inductively coupled plasma (ICP) analyses of Cu and elemental analyses of C, H, and N were conducted on a Perkin-Elmer Optima 3300DV spectrometer and a Perkin-Elmer 2400 elemental analyzer, respectively. Thermal gravimetric analysis (TGA) was conducted under an  $\text{N}_2$  atmosphere with a heating rate of  $10^\circ\text{C}/\text{min}$  on a SDT 2960 Simultaneous DSC-TGA of TA instruments up to  $800^\circ\text{C}$ . The infrared (IR)<sup>-1</sup> spectra (diamond) were recorded on a Nicolet 7600 FT-IR spectrometer within the  $4000\text{-}500 \text{ cm}^{-1}$  region.  $^1\text{H}$  NMR spectra were carried out in  $\text{CDCl}_3$  solvent on a Bruker 400 MHz spectrometer. The chemical shift is given in dimensionless  $\delta$  values and is referenced relative to TMS in  $^1\text{H}$  spectroscopy.

### 1.2 Cycloaddition of $\text{CO}_2$ to epoxides

The yield was calculated from H NMR according to the following equation.

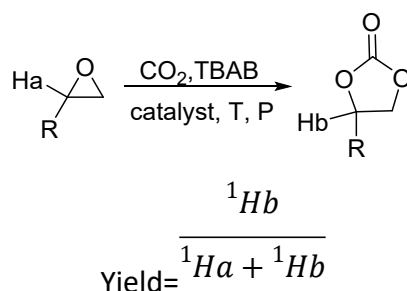

## S2 Supplementary tables and figures

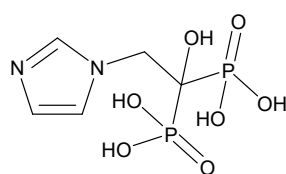

zoledronic acid

**Scheme S1.** Chemical structure of ligand

**Table S1** Selected bond lengths ( $\text{\AA}$ ) and angles (deg) for **1**

|             |            |              |           |
|-------------|------------|--------------|-----------|
| Co1-O4      | 2.083(4)   | Co1-O4A      | 2.083(4)  |
| Co1-O2      | 2.083(4)   | Co1-O2A      | 2.083(4)  |
| Co1-O12     | 2.132(5)   | Co1-O12A     | 2.132(5)  |
| Co2-O6B     | 2.021(4)   | Co2-O7C      | 2.186(4)  |
| Co2-O3C     | 2.119(5)   | Co2-O3       | 2.078(5)  |
| Co2-O5C     | 2.150(4)   | Co2-O9       | 2.099(6)  |
| O4-Co1-O4A  | 180.00(19) | O4A-Co1-O12A | 87.21(18) |
| O41-Co1-O12 | 92.79(18)  | O4-Co1-O12A  | 92.79(18) |

|              |            |             |            |
|--------------|------------|-------------|------------|
| O4-Co1-O12   | 87.21(18)  | O2-Co1-O4   | 91.34(17)  |
| O2A-Co1-O4A  | 91.34(17)  | O2-Co1-O4A  | 88.66(17)  |
| O2A-Co1-O4   | 88.66(17)  | O2A-Co1-O2  | 180.0      |
| O2A-Co1-O12  | 89.33(18)  | O2-Co1-O12  | 90.67(18)  |
| O2A-Co1-O12A | 90.67(18)  | O2-Co1-O12A | 89.33(18)  |
| O12-Co1-O12A | 180.0      | O6B-Co2-O7C | 94.02(17)  |
| O6B-Co2-O33  | 177.39(17) | O6B-Co2-O3  | 96.89(18)  |
| O6B-Co2-O5C  | 95.31(17)  | O6B-Co2-O9  | 94.1(3)    |
| O3C-Co2-O7C  | 83.55(17)  | O3-Co2-O7C  | 167.26(17) |
| O3-Co2-O3C   | 85.41(18)  | O3-Co2-O5C  | 91.93(18)  |
| O3C-Co2-O5C  | 83.34(18)  | O3-Co2-O9   | 94.3(3)    |
| O5C-Co2-O7C  | 80.50(16)  | O9-Co2-O7C  | 91.4(2)    |
| O9-Co2-O3C   | 86.9(3)    | O9-Co2-O5C  | 168.0(2)   |

<sup>a</sup>Symmetry code A: 1-x, 1-y, 2-z; B: -1+x, y, z; C: 1-x, -y, 2-z

**Table S2** Selected bond lengths (Å) and angles (deg) for **2**

|             |           |             |            |
|-------------|-----------|-------------|------------|
| Cd2-O5A     | 2.210(3)  | Cd1-O7      | 2.260(3)   |
| Cd2-O5      | 2.210(3)  | Cd1-O4B     | 2.352(3)   |
| Cd2-O9      | 2.363(4)  | Cd1-O4      | 2.331(3)   |
| Cd2-O9A     | 2.363(4)  | Cd1-O6C     | 2.295(3)   |
| Cd2-O8A     | 2.293(3)  | Cd1-O3D     | 2.289(3)   |
| Cd2-O8      | 2.293(3)  | Cd1-N1E     | 2.264(4)   |
| O5A-Cd2-O5  | 180.0     | O7-Cd1-O4B  | 163.57(11) |
| O5-Cd2-O9A  | 90.10(11) | O7-Cd1-O4   | 86.01(11)  |
| O5ACd2-O9   | 90.10(11) | O7-Cd1-O6C  | 82.54(10)  |
| O5A-Cd2-O9A | 89.90(11) | O7-Cd1-O3D  | 101.74(11) |
| O5-Cd2-O9   | 89.90(11) | O7-Cd1-N1E  | 89.68(12)  |
| O5A-Cd2-O8  | 90.02(11) | O4-Cd1-O4B  | 83.88(10)  |
| O5-Cd2-O8   | 89.98(11) | O6C-Cd1-O4B | 82.84(10)  |
| O5-Cd2-O8A  | 90.02(11) | O6C-Cd1-O4  | 79.02(10)  |
| O5A-Cd2-O8A | 89.98(11) | O3D-Cd1-O4B | 92.39(11)  |
| O9-Cd2-O9A  | 180.0     | O3D-Cd1-O4  | 97.33(10)  |
| O8A-Cd2-O9A | 92.65(15) | O3D-Cd1-O6C | 174.24(11) |
| O8A-Cd2-O9  | 87.35(15) | N1E-Cd1-O4B | 99.48(12)  |
| O8-Cd2-O9A  | 87.35(15) | N1E-Cd1-O4  | 174.38(11) |

|            |           |             |           |
|------------|-----------|-------------|-----------|
| O8-Cd2-O9  | 92.65(15) | N1E-Cd1-O6C | 96.85(12) |
| O8-Cd2-O8A | 180.0     | N1E-Cd1-O3D | 87.08(12) |

<sup>a</sup>Symmetry code A:1-x,1-y,-z; B:2-x,1-y,-1-z; C:1+x,+y,+z; D:1-x,1-y,-1-z; E:+x,1+y,+z

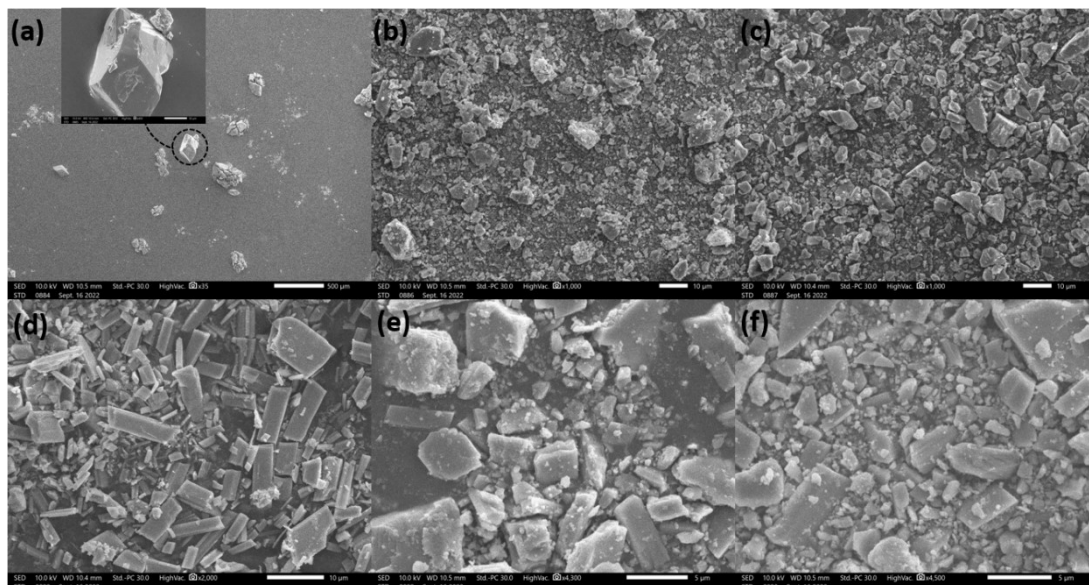

**Figure S1** SEM diagram of compound 1 before (a; inset a: one crystal of compound 1 at the 50μm scale) and after (b) grinding and after catalytic reaction (c); SEM diagram of compound 2 before (d) and after (e) grinding and after catalytic reaction (f).

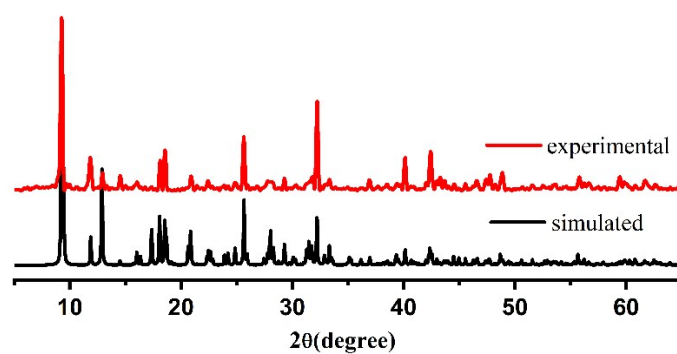

**Figure S2** PXRD patterns of compound 1.

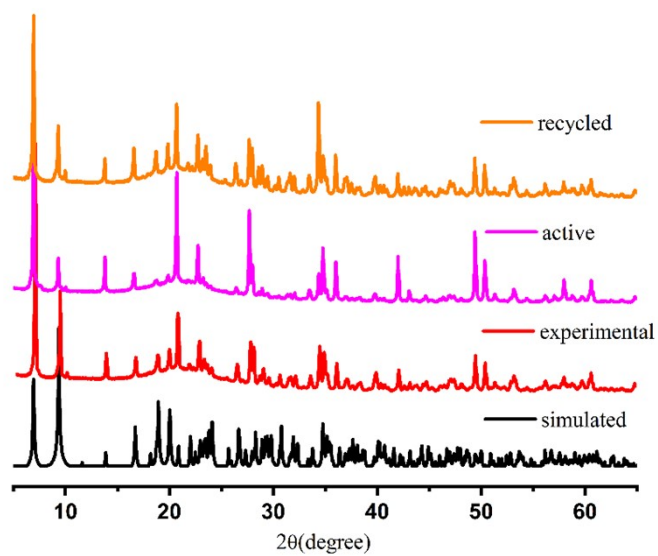

Figure S3 PXRD patterns of compound 2.

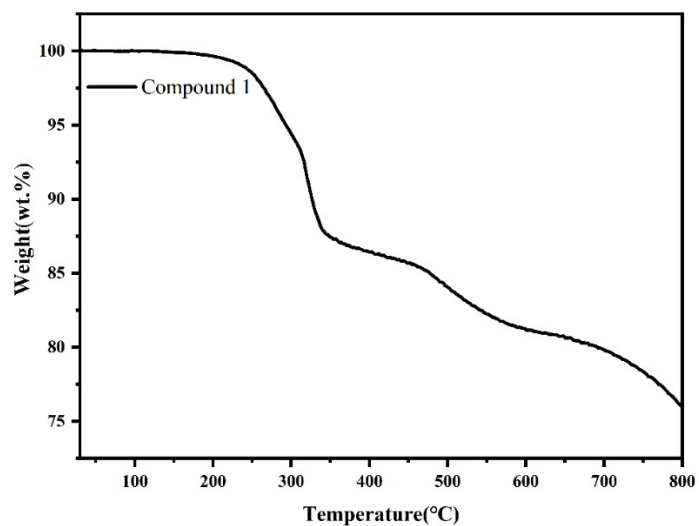

Figure S4 TGA curve of compound 1.

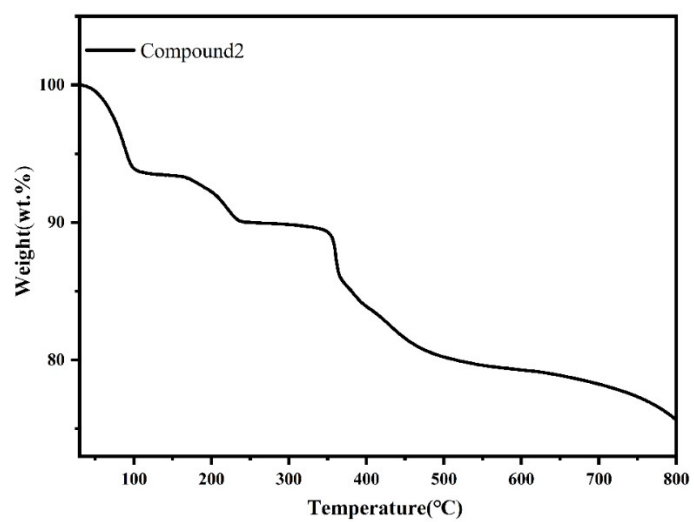

Figure S5 TGA curve of compound 2.

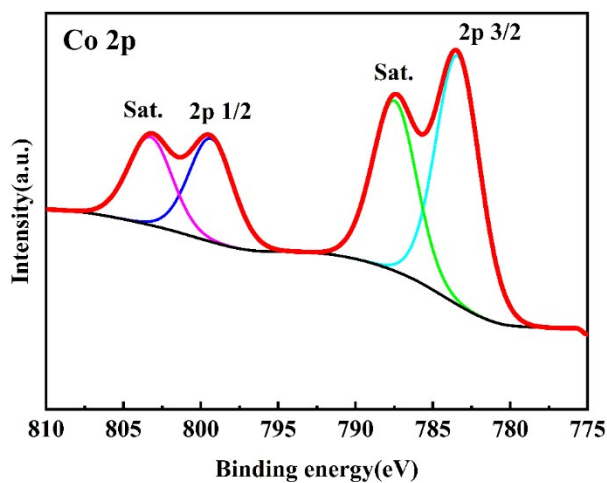

**Figure S6** High-resolution XPS spectra of compound 1 in the Co 2p region.

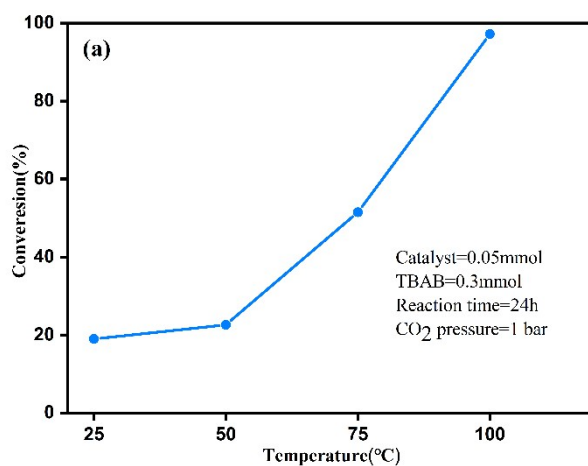

**Figure S7** Reaction temperature that affect the cycloaddition of SO and CO<sub>2</sub>.

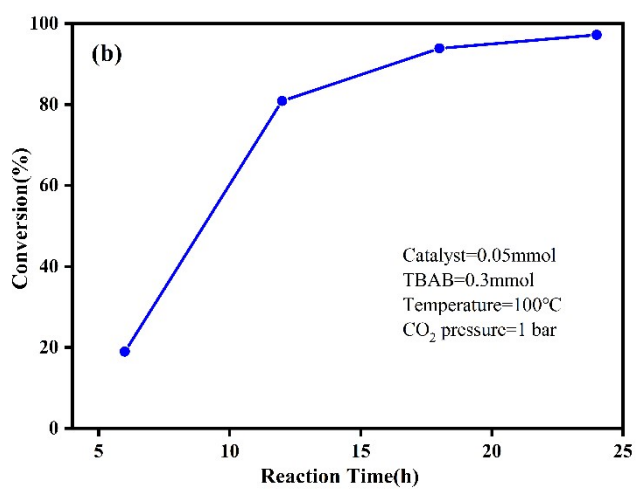

**Figure S8** Reaction time that affect the cycloaddition of SO and CO<sub>2</sub>.

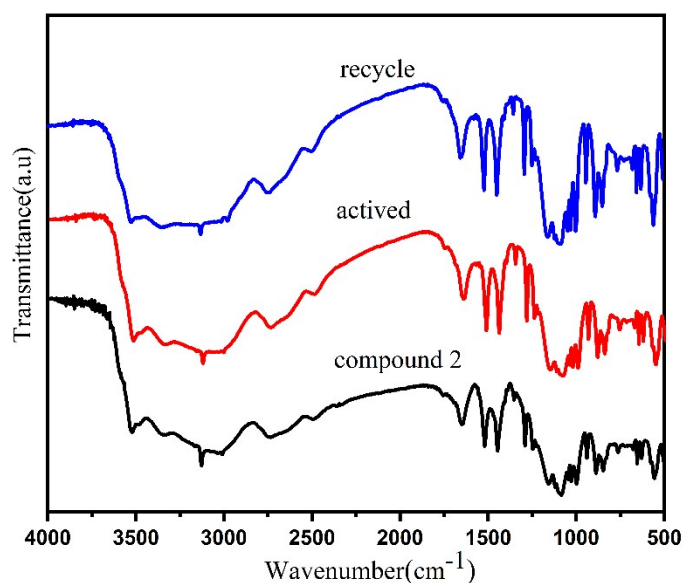

**Figure S9** Infrared spectra of compound 2.

**Table S3** Compound 2 catalytic of cycloaddition of CO<sub>2</sub> to styrene epoxide<sup>a</sup>

| Entry | Catalyst          | Co-catalyst | Substrate | Time(h) | Conversion(%) <sup>b</sup> |
|-------|-------------------|-------------|-----------|---------|----------------------------|
| 1     | 0.05              | none        | SO        | 12      | 4.3                        |
| 2     | none              | 0.3         | SO        | 12      | 17.9                       |
| 3     | 0.05              | 0.3         | SO        | 12      | 97.5                       |
| 4     | 0.05 <sup>c</sup> | 0.3         | SO        | 12      | 52.2                       |
| 5     | 0.025             | 0.15        | SO        | 12      | 79.2                       |
| 6     | 0.05              | 0.3         | BGE       | 12      | 92.5                       |

<sup>a</sup>Reaction conditions: epoxide=10 mmol (SO, styrene epoxide; BGE, butyl glycidyl ether), compound 2 (0.05mmol), and TBAB(0.3mmol) under 1atm CO<sub>2</sub>, 100°C. <sup>b</sup>Determined by GC. <sup>c</sup>Reuse1.

**Table S4** Comparative catalytic performance of 1 with others previously reported Co-MOFs catalysts for cycloaddition of epoxides with CO<sub>2</sub>.

| NO. | catalyst<br>Co based MOFs | Co-catalyst | Temperature<br>(°C) | Pressure<br>(MPa) | Time<br>(h) | Yield<br>(%) | Ref. |
|-----|---------------------------|-------------|---------------------|-------------------|-------------|--------------|------|
| 1   | Co-MOF-74(M)              | -           | 100                 | 2                 | 4           | 96           | 32a  |
| 2   | ZIF-67                    | -           | 120                 | 1                 | 6           | 87           | 32b  |
| 3   | Co/ZIF-8                  | -           | 120                 | 0.7               | 8           | 96.8         | 32c  |
| 4   | TPPCoCl                   | TBAI        | 120                 | 1.8               | 12          | 24.1         | 32d  |
| 5   | Co-MOF-184                | TBAB        | 80                  | 0.1               | 6           | 72           | 32e  |
| 6   | Co(XN)(HCOO) <sub>2</sub> | TBAB        | 90                  | 0.1               | 12          | 99           | 32f  |
| 7   | Co(TCPB) <sub>0.5</sub>   | TBAB        | 80                  | 0.1               | 9           | 80.8         | 32g  |

|    |                   |      |     |     |    |      |           |
|----|-------------------|------|-----|-----|----|------|-----------|
| 8  | Co(BDC)(L)        | TBAB | 40  | 0.1 | 12 | 99   | 32h       |
| 9  | Co(OBA)(L')       | TBAB | 60  | 0.1 | 24 | 99   | 32i       |
| 10 | Co( $\mu_3$ -L'') | TBAB | 50  | 0.1 | 36 | 94.3 | 32j       |
| 11 | Co(L''')          | TBAB | RT  | 0.1 | 8  | 91.7 | 32k       |
| 12 | Compound 1        | TBAB | 100 | 0.1 | 24 | 97.4 | This work |

### S3. The NMR spectrums

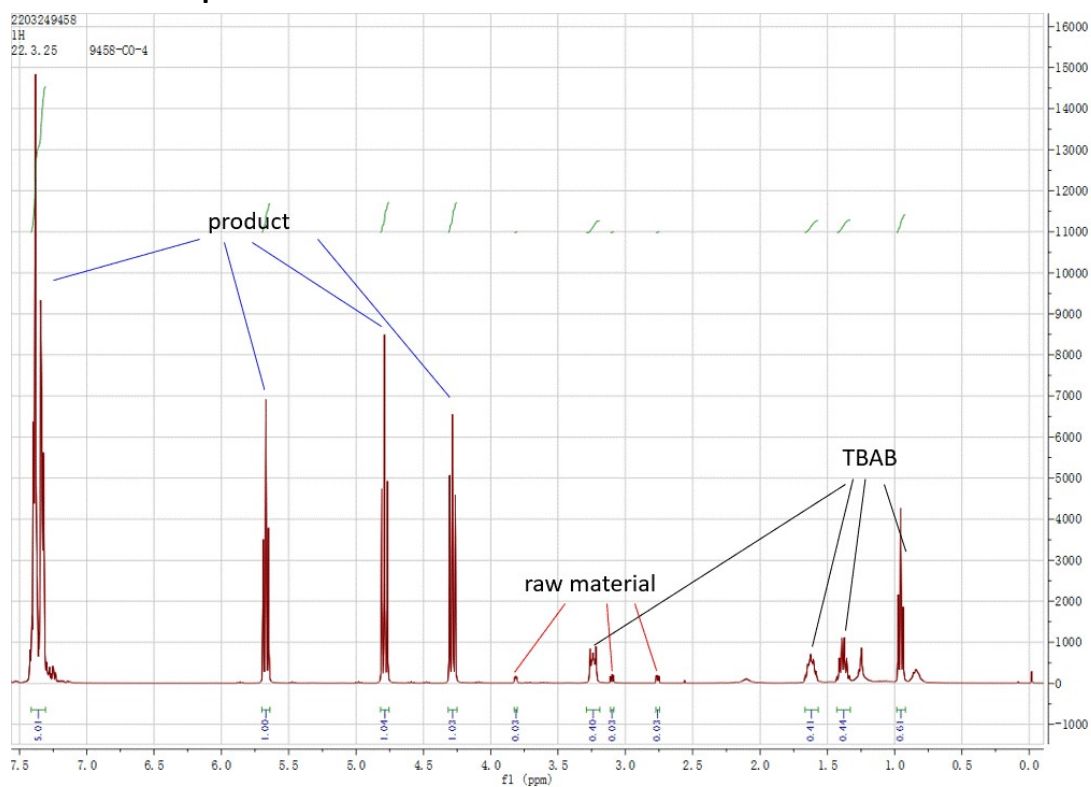

**Figure S9** The 1H NMR results of Catalytic Styrene oxide cycloaddition with CO<sub>2</sub> using compound 1 as catalyst under the optimized reaction conditions mentioned in main body.
